# Supplementary material for: Surface modification strategy for fluorescence solvatochromism of carbon dots prepared from p-phenylenediamine
Source: Royal Society of Chemistry journal article supplement (doi:10.1039/c9cc09333h), 2020-01-01
Supplement: c9cc09333h1.pdf [file c9cc09333h1.pdf]

## **Electronic Supplementary Information**

### *Chemical Communications*

# **Surface Modification Strategy for Fluorescence Solvatochromism of Carbon Dots Prepared from *p*-Phenylenediamine**

Kohei Sato, Rina Sato, Yoshiki Iso\* and Tetsuhiko Isobe\*

*Department of Applied Chemistry, Faculty of Science and Technology, Keio University,  
3-14-1 Hiyoshi, Kohoku-ku, Yokohama 223-8522, Japan*

\*Corresponding authors.

Telephone: +81 45 566 1558 (Y.I.), +81 45 566 1554 (T.I.).

Fax: +81 45 566 1551 (T.I.).

E-mail: iso@applc.keio.ac.jp (Y.I.), isobe@applc.keio.ac.jp (T.I.).

## Experimental Section

### Materials

*p*-PD (98.0%) and DA (98.0%) were purchased from Tokyo Chemical Industry. PFDA (98.0%) was purchased from Sigma-Aldrich. Diphenyl ether (99.0%) was purchased from FUJIFILM Wako Pure Chemical. Hexane (95.0%), chloroform (99.0%), and methanol (99.8%) were purchased from Kanto Chemical. All reagents were used as received without further purification.

### Preparation of CDs

*p*-PD (0.60 g, 5.5 mmol) was mixed with diphenyl ether (45 mL). The mixture was refluxed at 250 °C for 8 h under ambient atmosphere. After cooling to room temperature, the obtained suspension was poured into hexane (180 mL). The resulting precipitate was collected by centrifugation at  $\sim 11,000 \times g$  (10,000 rpm, using a rotor with a diameter of 10 cm) for 10 min. After repeating the purification process three times, the precipitate was air-dried overnight to yield CD powder. The powder (1 mg) was re-dispersed in chloroform (10 mL) and methanol (10 mL) under ultrasonication. 4-Fold-diluted dispersions of these dispersions were used for characterization.

*Surface modification of CDs:* The as-prepared CD powder (0.10 g) was added to DA (1.59 g, 9.25 mmol). The mixture was refluxed at 170 °C for 4 h under ambient atmosphere. After cooling to room temperature, the obtained black solid was purified by redispersion in hexane (100 mL) and centrifugation at  $\sim 11,000 \times g$  for 10 min to remove excess DA. After the purification process was repeated three times, the precipitate was air-dried overnight to yield DA-CD powder. The CD powder (0.10 g) was also added to PFDA (4.75 g, 9.25 mmol). The mixture was refluxed at 170 °C for 4 h under ambient atmosphere. After cooling to room temperature, the obtained black solid was purified by evaporating excess PFDA at 100 °C using a rotary evaporator and air-dried overnight to yield PFDA-CD powder. DA-CDs and PFDA-CD powders (1 mg) were re-dispersed in chloroform (10 mL) and methanol (10 mL) under ultrasonication. 4-Fold-diluted dispersions of these dispersions were used for characterization.

### Characterization

FT-IR spectra of pressed KBr discs containing the powders were measured on an FT-IR spectrometer (JASCO, FT/IR-4200). XPS spectra were measured on an X-ray photoelectron spectrometer (JEOL, JPS-9010TR) with a Mg K $\alpha$  radiation source. The binding energy of C–C/C=C bonds in the C 1s spectra at 284.4 eV was used for the

charge-up correction. The morphologies of all samples were observed with a TEM (FEI, Tecnai 12). The samples for TEM observation were prepared by drying a drop of each methanol dispersion on a copper grid covered with a carbon-reinforced collodion film (Okenshoji, COL-C10). The samples were also observed using an AFM (HITACHI, AFM5100N) in dynamic force mode. The samples for AFM were prepared by drying a drop of a methanol dispersion of each sample on a p-type silicon wafer (Nilaco, < 0.02  $\Omega$  cm). PL spectra and PLE spectra of the dispersions were measured on a fluorescence spectrometer (JASCO, FP-6500). Each spectral response was calibrated against an ethylene glycol solution of rhodamine B (5.5 g L<sup>-1</sup>) and a standard light source (JASCO, ESC-333). The absolute PL QYs of the dispersions were measured on a quantum efficiency measurement system (Otsuka Electronics, QE-2000-311C). PL decay curves of the dispersions were measured on a PL lifetime spectrometer (Hamamatsu Photonics, Quantaaurus-Tau C11367) equipped with 405 and 470 nm LEDs as the light sources. The PL decay curves were fitted with the following biexponential equation:

$$f(t) = A_1 \exp\left(-\frac{t}{\tau_1}\right) + A_2 \exp\left(-\frac{t}{\tau_2}\right), \quad (1)$$

where  $f(t)$  is the PL intensity at time  $t$ ,  $A_1$  and  $A_2$  are the amplitudes, and  $\tau_1$  and  $\tau_2$  are the PL decay times. The average PL lifetime,  $\tau_{ave}$ , was calculated using equation (2).

$$\tau_{ave} = \frac{A_1 \tau_1^2 + A_2 \tau_2^2}{A_1 \tau_1 + A_2 \tau_2} \quad (2)$$

### Assignments of FT-IR peaks

The FT-IR spectra of CDs, DA-CDs, PFDA-CDs, *p*-PD, DA, and PFDA are shown in Fig. S1, and assignments of the FT-IR peaks are summarized in Tables S1–S3. The CDs, DA-CDs, and PFDA-CDs maintained the structure of *p*-PD, as confirmed by the aryl C–H stretching vibrations (3060–3000  $\text{cm}^{-1}$ ; No. 9), C=C stretching vibration (1520  $\text{cm}^{-1}$ ; No. 19), C–H bending vibrations (1130–1120  $\text{cm}^{-1}$ ; No. 27, 850–830  $\text{cm}^{-1}$ ; No. 29, 520  $\text{cm}^{-1}$ ; No. 31), C=N stretching vibration (1610–1600  $\text{cm}^{-1}$ ; No. 17), and C–N stretching vibrations (1310  $\text{cm}^{-1}$ ; No. 24, 1270–1250  $\text{cm}^{-1}$ ; No. 25).

The CDs retained the amino group in *p*-PD, as confirmed by the  $\text{NH}_2$  asymmetric and symmetric stretching vibrations (3420–3360  $\text{cm}^{-1}$ ; No. 2, 3320  $\text{cm}^{-1}$ ; No. 3), overtone of  $\text{NH}_2$  bending vibration (3200  $\text{cm}^{-1}$ ; No. 4), and  $\text{NH}_2$  bending vibrations (1630  $\text{cm}^{-1}$ ; No. 16, 770–650  $\text{cm}^{-1}$ ; No. 30). In contrast, the DA-CDs contained amide bonds rather than amino groups, as confirmed by the N–H stretching vibration (3320  $\text{cm}^{-1}$ ; No. 7), overtone of CNH bending and C–N stretching vibrations (3150  $\text{cm}^{-1}$ ; No. 8), C=O stretching vibration (1650  $\text{cm}^{-1}$ ; No. 15), and CNH bending and C–N stretching vibrations (1550  $\text{cm}^{-1}$ ; No. 18). Furthermore, the DA-CDs contained alkyl chains, as verified by the  $\text{CH}_3$  asymmetric and symmetric stretching vibrations (2960  $\text{cm}^{-1}$ ; No. 10, 2870  $\text{cm}^{-1}$ ; No. 12),  $\text{CH}_2$  asymmetric and symmetric stretching vibrations (2920  $\text{cm}^{-1}$ ; No. 11, 2850  $\text{cm}^{-1}$ ; No.

13), CH<sub>2</sub> and CH<sub>3</sub> asymmetric bending vibrations (1470 cm<sup>-1</sup>; No. 21), and CH<sub>3</sub> symmetric bending vibration (1410 cm<sup>-1</sup>; No. 23), which were not detected for the CDs. The DA-CDs did not have carboxy groups because there were no signals due to the O–H stretching vibrations (3400–3000 cm<sup>-1</sup>; No. 6) or C–OH bending vibration (1430 cm<sup>-1</sup>; No. 22), which were observed for DA. This finding reveals that the CDs are modified with DA through amide bonds to form DA-CDs, as already shown in Fig. 1. In addition, the peak assigned to the C=O stretching vibration for DA-CDs (1650 cm<sup>-1</sup>; No. 15) was located at a lower wavenumber than that for DA (1700 cm<sup>-1</sup>; No. 14), which is attributed to the weakened bond strength of C=O caused by electron donation from nitrogen to carbon in the amide bond due to the resonance effect for DA-CDs.<sup>S1</sup>

The PFDA-CDs also contained amide bonds rather than amino groups, as confirmed by the N–H stretching vibration (3330 cm<sup>-1</sup>; No. 7), overtone of CNH bending and C–N stretching vibrations (3160 cm<sup>-1</sup>; No. 8), C=O stretching vibration (1700 cm<sup>-1</sup>; No. 15), and CNH bending and C–N stretching vibrations (1560 cm<sup>-1</sup>; No. 18). Furthermore, the PFDA-CDs contained perfluoroalkyl chains, as verified by the C–F stretching vibrations (1350–1100 cm<sup>-1</sup>; No. 28), which were not detected for the CDs. The PFDA-CDs did not contain carboxy groups because there were no signals due to O–H stretching vibrations (3600–3400 cm<sup>-1</sup>; No. 5) or C–OH bending vibration (1460 cm<sup>-1</sup>; No. 22), which were

observed for PFDA. This result reveals that the CDs were modified with PFDA through amide bonds to form PFDA-CDs, as already shown in Fig. 1. In addition, the peak assigned to the C=O stretching vibration for PFDA-CDs ( $1700\text{ cm}^{-1}$ ; No. 15) was located at the same wavenumber as that for PFDA ( $1700\text{ cm}^{-1}$ ; No. 14), which is attributed to two opposite two factors: electron donation from nitrogen in the amide bond by the resonance effect and electron withdrawal from the perfluoroalkyl group by the inductive effect.

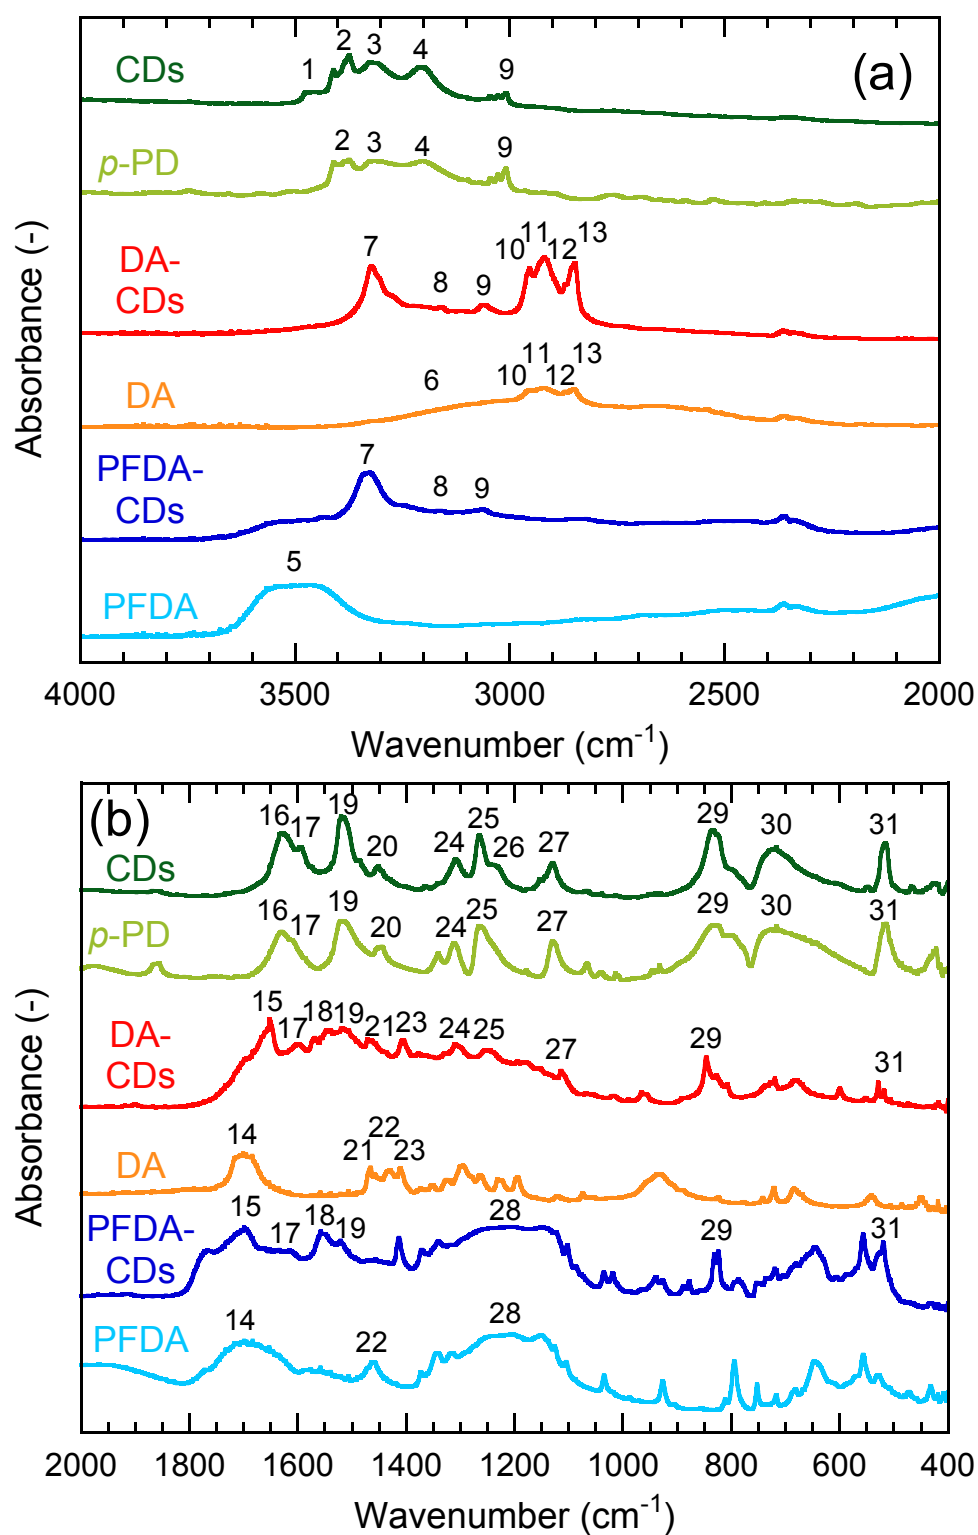

**Figure S1.** FT-IR spectra of the CDs, *p*-PD, DA-CDs, DA, PFDA-CDs, and PFDA in the ranges of (a) 4000–2000  $\text{cm}^{-1}$  and (b) 2000–400  $\text{cm}^{-1}$ .



**Table S1.** Assignments of FT-IR peaks of CDs and *p*-PD.

| Peak number | Peak position (cm <sup>-1</sup> ) |              | Assignment <sup>S1</sup>              |
|-------------|-----------------------------------|--------------|---------------------------------------|
|             | CDs                               | <i>p</i> -PD |                                       |
| 1           | 3480–3420                         |              | N–H stretching                        |
| 2           | 3420–3360                         | 3420–3360    | NH <sub>2</sub> asymmetric stretching |
| 3           | 3320                              | 3330         | NH <sub>2</sub> symmetric stretching  |
| 4           | 3200                              | 3200         | overtone of NH <sub>2</sub> bending   |
| 9           | 3050–3000                         | 3050–3000    | aryl C–H stretching                   |
| 16          | 1630                              | 1630         | NH <sub>2</sub> bending               |
| 17          | 1600                              | 1610         | C=N stretching                        |
| 19          | 1520                              | 1520         | aryl ring semicircle stretching       |
| 20          | 1450                              | 1450         | aryl ring semicircle stretching       |
| 24          | 1310                              | 1310         | aryl C–N stretching                   |
| 25          | 1270                              | 1270         | aryl C–N stretching                   |
| 26          | 1230                              |              | aryl C–O stretching                   |
| 27          | 1130                              | 1130         | in-plane bending                      |
| 29          | 840                               | 830          | H wagging                             |
| 30          | 770–650                           | 770–650      | NH <sub>2</sub> wagging               |
| 31          | 520                               | 520          | out-of-plane bending                  |

**Table S2.** Assignments of FT-IR peaks of DA-CDs and DA.

| Peak number | Peak position (cm <sup>-1</sup> ) |           | Assignment <sup>S1</sup>                                        |
|-------------|-----------------------------------|-----------|-----------------------------------------------------------------|
|             | DA-CDs                            | DA        |                                                                 |
| 6           |                                   | 3400–3000 | O–H stretching                                                  |
| 7           | 3320                              |           | NH stretching                                                   |
| 8           | 3150                              |           | [ overtone of CNH bending<br>overtone of C–N stretching         |
| 9           | 3060                              |           | aryl C–H stretching                                             |
| 10          | 2960                              | 2960      | CH <sub>3</sub> asymmetric stretching                           |
| 11          | 2920                              | 2920      | CH <sub>2</sub> asymmetric stretching                           |
| 12          | 2870                              | 2870      | CH <sub>3</sub> symmetric stretching                            |
| 13          | 2850                              | 2850      | CH <sub>2</sub> symmetric stretching                            |
| 14          |                                   | 1700      | C=O asymmetric stretching                                       |
| 15          | 1650                              |           | C=O stretching                                                  |
| 17          | 1600                              |           | C=N stretching                                                  |
| 18          | 1550                              |           | [ CNH bending<br>C–N stretching                                 |
| 19          | 1520                              |           | aryl ring semicircle stretching                                 |
| 21          | 1470                              | 1470      | [ CH <sub>2</sub> bending<br>CH <sub>3</sub> asymmetric bending |
| 22          |                                   | 1430      | C–OH bending                                                    |
| 23          | 1410                              | 1410      | CH <sub>3</sub> symmetric bending                               |
| 24          | 1310                              |           | aryl C–N stretching                                             |
| 25          | 1250                              |           | aryl C–N stretching                                             |
| 27          | 1120                              |           | in-plane bending                                                |
| 29          | 850                               |           | H wagging                                                       |
| 31          | 520                               |           | out-of-plane bending                                            |

**Table S3.** Assignments of FT-IR peaks of PFDA-CDs and PFDA.

| Peak number | Peak position (cm <sup>-1</sup> ) |           | Assignment <sup>S1</sup>                                |
|-------------|-----------------------------------|-----------|---------------------------------------------------------|
|             | PFDA-CDs                          | PFDA      |                                                         |
| 5           |                                   | 3600–3400 | O–H stretching                                          |
| 7           | 3330                              |           | NH stretching                                           |
| 8           | 3160                              |           | [ overtone of CNH bending<br>overtone of C–N stretching |
| 9           | 3060                              |           |                                                         |
| 14          |                                   | 1700      | C=O asymmetric stretching                               |
| 15          | 1700                              |           | C=O stretching                                          |
| 17          | 1610                              |           | C=N stretching                                          |
| 18          | 1560                              |           | [ CNH bending<br>C–N stretching                         |
| 19          | 1520                              |           |                                                         |
| 22          |                                   | 1460      | aryl ring semicircle stretching                         |
| 28          | 1350–1100                         | 1350–1100 | C–OH bending                                            |
| 29          | 830                               |           | C–F stretching                                          |
| 31          | 520                               |           | H wagging                                               |
|             |                                   |           | out-of-plane bending                                    |

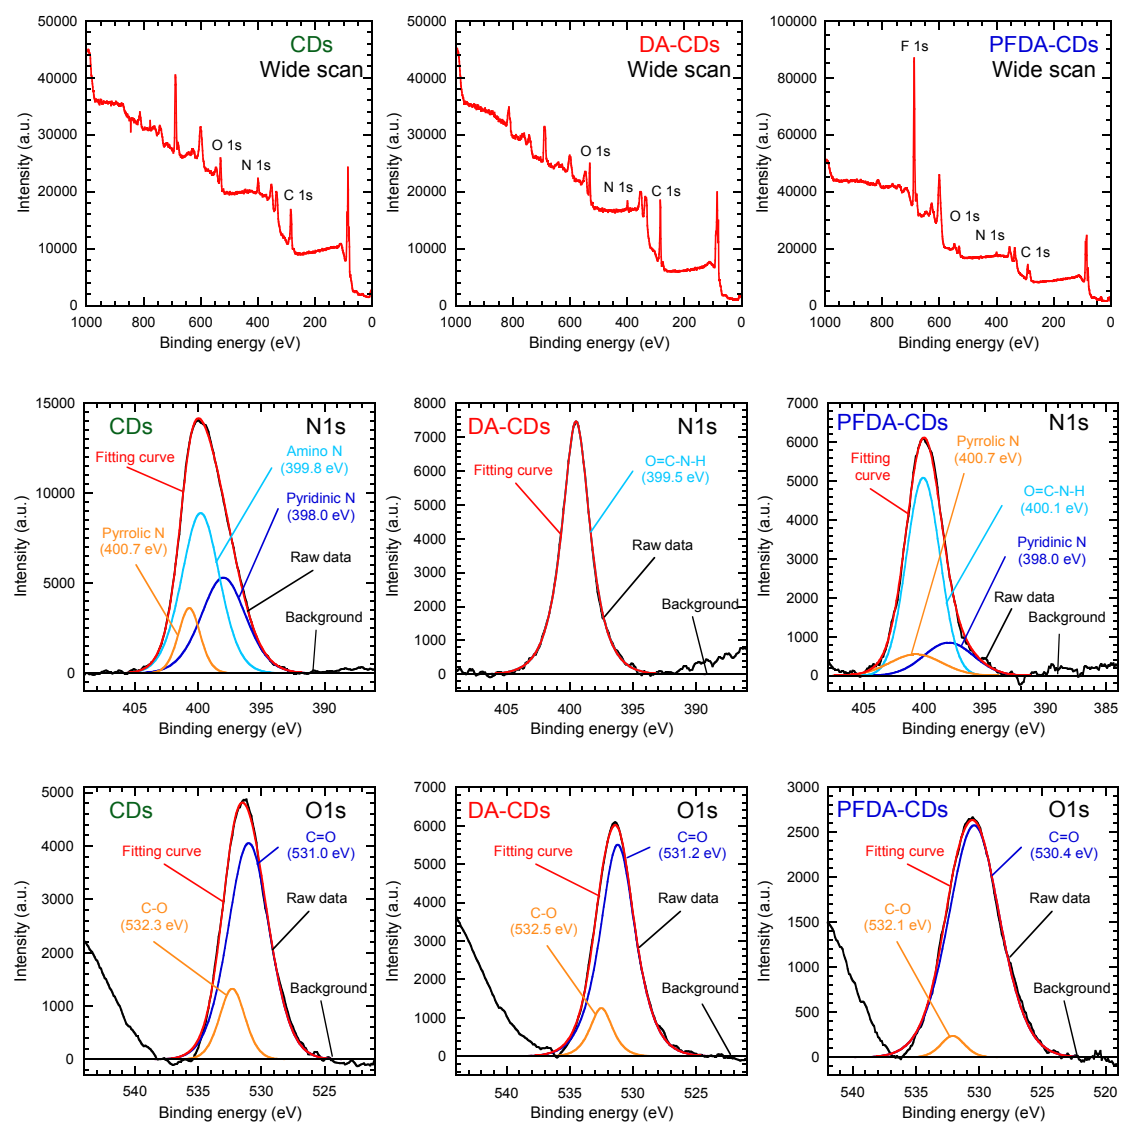

**Figure S2.** Wide-scan, N 1s, and O 1s XPS spectra of CDs, DA-CDs, and PFDA-CDs.

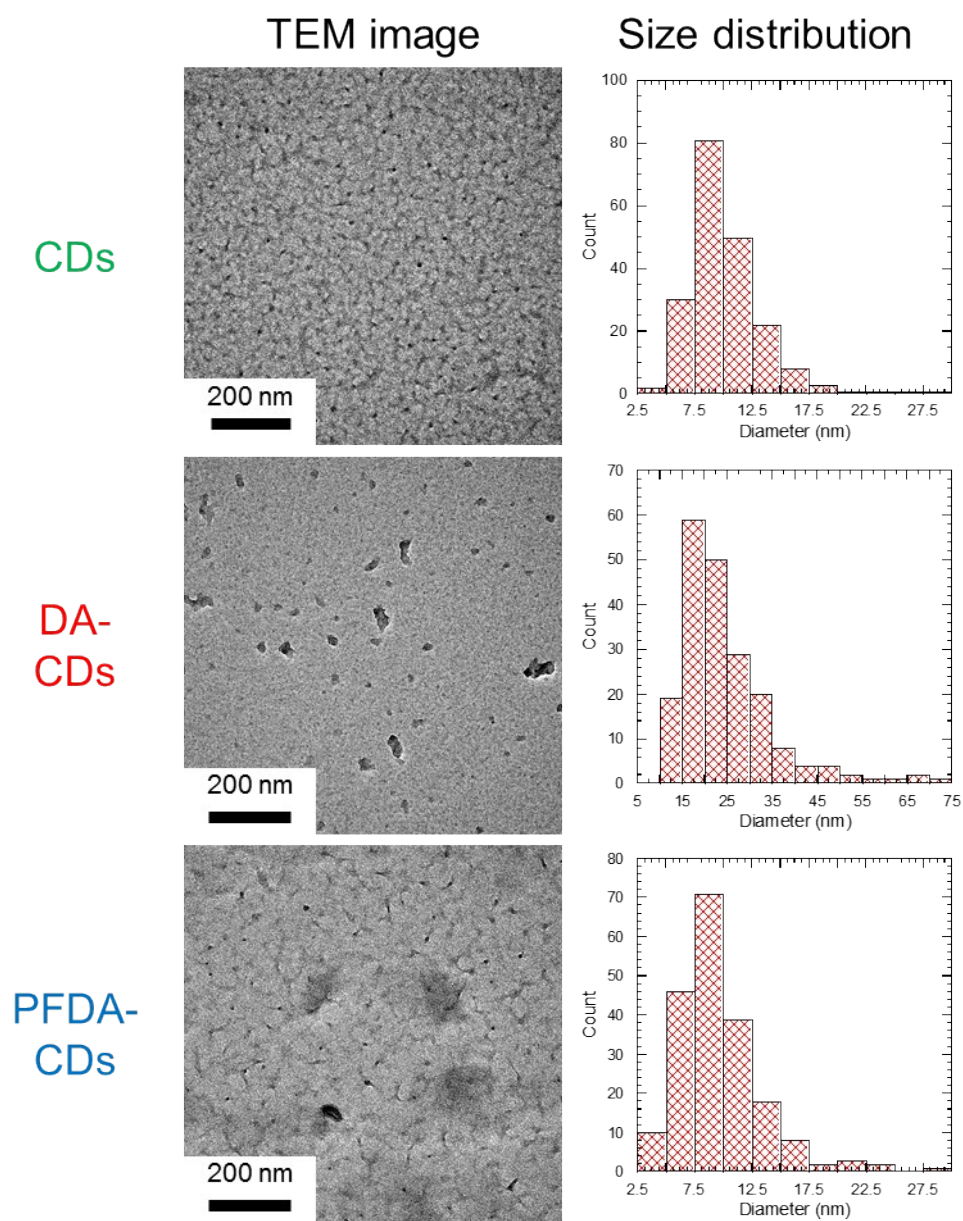

**Figure S3.** TEM images and particle size distributions of the CDs, DA-CDs, and PFDA-CDs.

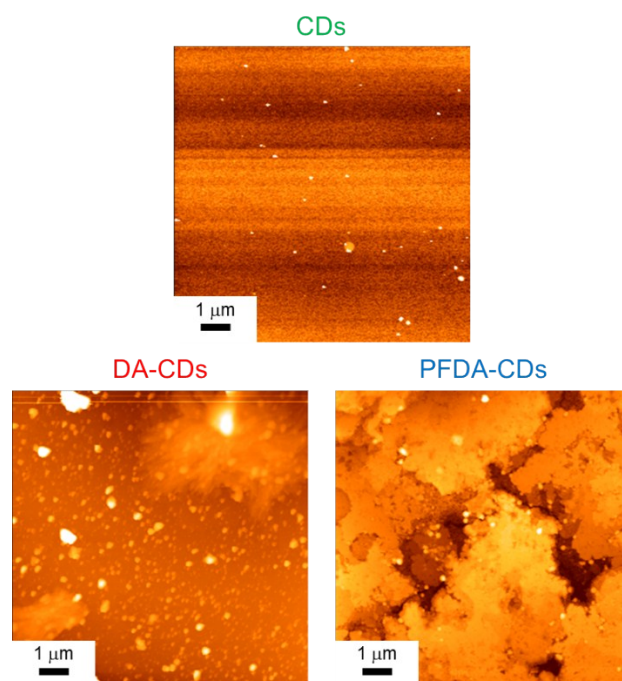

**Figure S4.** AFM images of the CDs, DA-CDs, and PFDA-CDs.

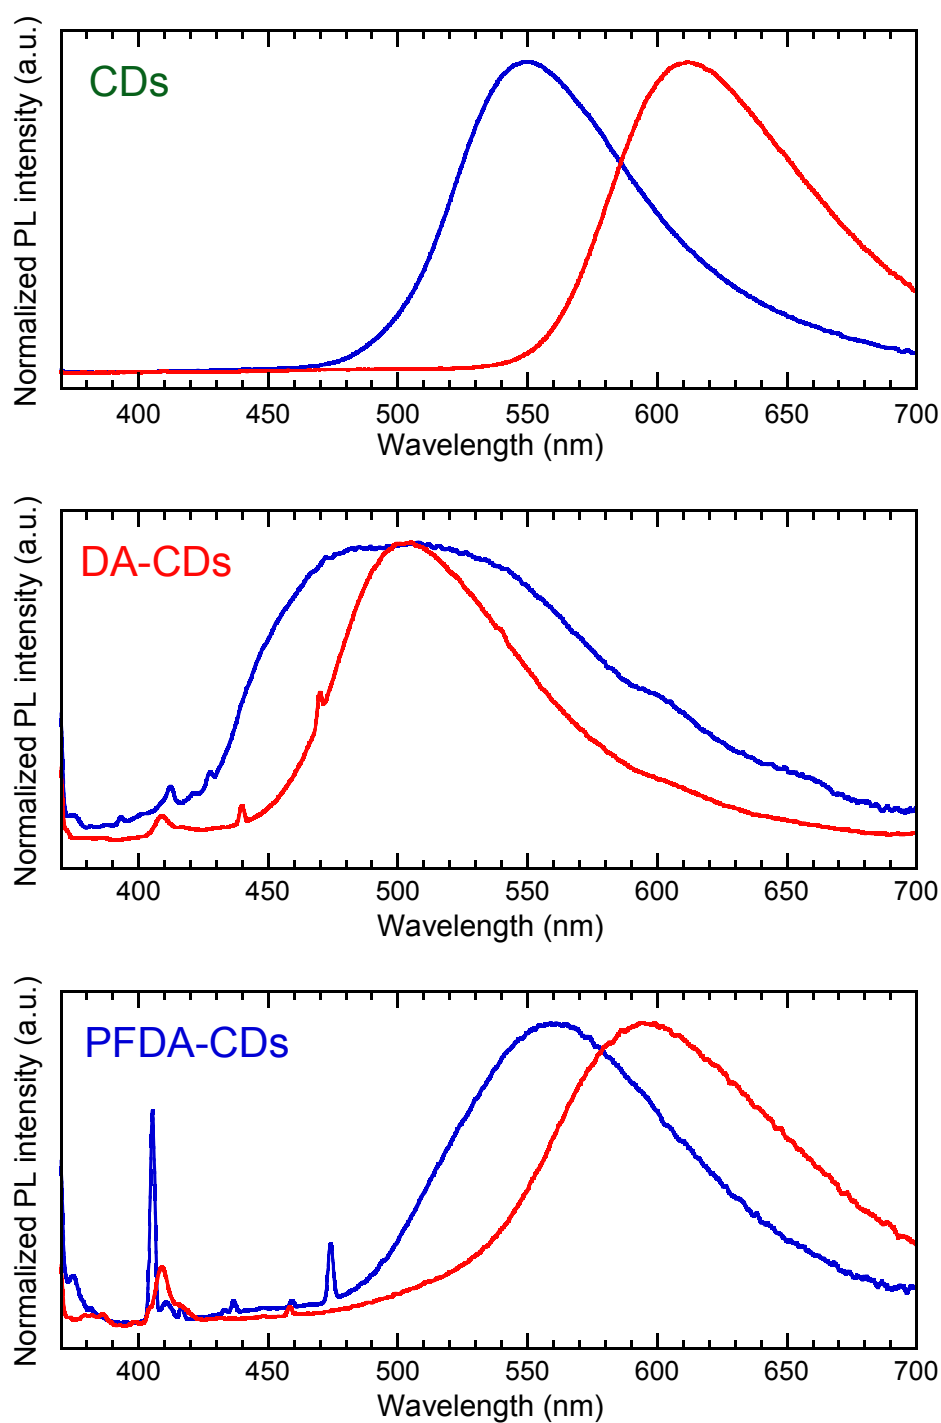

**Figures S5.** Normalized PL spectra of CDs, DA-CDs, and PFDA-CDs in chloroform (blue) and methanol (red) under 365 nm excitation.

**Table S4.** PL/PLE peak wavelengths and PL full widths at half maximum (FWHMs) of chloroform and methanol dispersions of each sample and PL/PLE peak shifts between both dispersions.

| Sample   | Chloroform                    |                               |              | Methanol                      |                               |              | Peak Shift                          |                                     |
|----------|-------------------------------|-------------------------------|--------------|-------------------------------|-------------------------------|--------------|-------------------------------------|-------------------------------------|
|          | $\lambda_{\text{ex}}$<br>(nm) | $\lambda_{\text{em}}$<br>(nm) | FWHM<br>(nm) | $\lambda_{\text{ex}}$<br>(nm) | $\lambda_{\text{em}}$<br>(nm) | FWHM<br>(nm) | $\Delta\lambda_{\text{ex}}$<br>(nm) | $\Delta\lambda_{\text{em}}$<br>(nm) |
| CDs      | 473                           | 556                           | 84           | 517                           | 611                           | 90           | 44                                  | 55                                  |
| DA-CDs   | 418                           | 501                           | 142          | 424                           | 504                           | 83           | 6                                   | 3                                   |
| PFDA-CDs | 455                           | 561                           | 103          | 533                           | 598                           | 104          | 78                                  | 37                                  |

**Table S5.** Absolute PL QYs of chloroform and methanol dispersions of each sample excited at the optimum excitation wavelength.

| Sample   | Chloroform                 |           | Methanol                   |           |
|----------|----------------------------|-----------|----------------------------|-----------|
|          | $\lambda_{\text{ex}}$ (nm) | PL QY (%) | $\lambda_{\text{ex}}$ (nm) | PL QY (%) |
| CDs      | 473                        | 30.3      | 517                        | 14.1      |
| DA-CDs   | 418                        | 0.244     | 424                        | 1.59      |
| PFDA-CDs | 455                        | 4.19      | 533                        | 0.861     |



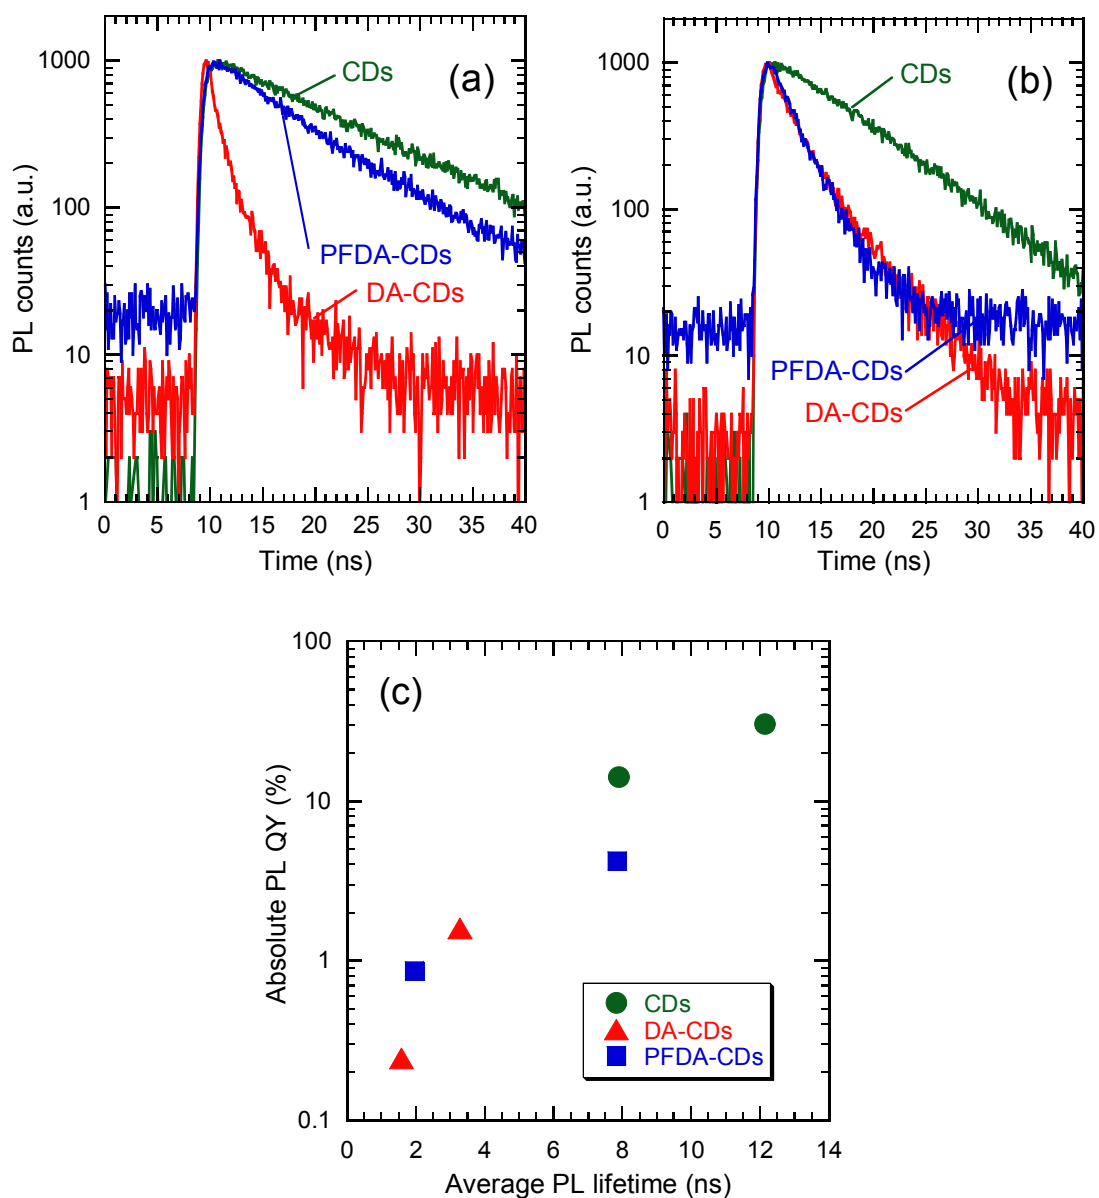

**Figures S6.** (a, b) PL decay curves of CDs, DA-CDs, and PFDA-CDs in (a) chloroform and (b) methanol.  $\lambda_{\text{ex}}$ : 405 nm (DA-CDs) and 470 nm (CDs, PFDA-CDs). (c) Correlation between the average PL lifetime and the absolute PL QY.

**Table S6.** Fitted parameters of the PL decay curves of chloroform and methanol dispersions of each sample.

| Solvent    | Sample   | $\tau_1$ (ns) | $A_1$ (%) | $\tau_2$ (ns) | $A_2$ (%) | $\tau_{\text{ave}}$ (ns) | $\chi^2$ |
|------------|----------|---------------|-----------|---------------|-----------|--------------------------|----------|
| Chloroform | CDs      | 2.76          | 29.1      | 13.1          | 70.9      | 12.3                     | 0.988    |
|            | DA-CDs   | 0.556         | 80.3      | 2.45          | 19.7      | 1.54                     | 1.45     |
|            | PFDA-CDs | 2.28          | 39.7      | 8.93          | 60.3      | 7.97                     | 1.05     |
| Methanol   | CDs      | 0.572         | 35.8      | 7.97          | 64.2      | 7.68                     | 1.02     |
|            | DA-CDs   | 1.61          | 61.0      | 4.46          | 39.0      | 3.43                     | 0.899    |
|            | PFDA-CDs | 1.14          | 58.4      | 2.51          | 41.6      | 1.98                     | 1.18     |

## References

S1 P. J. Larkin, *Infrared and Raman Spectroscopy: Principles and Spectral Interpretation*, 2nd ed., ELSEVIER, Amsterdam, 2018.
